# Supplementary material for: Shift work and cognitive impairment in later life – results of a cross-sectional pilot study testing the feasibility of a large-scale epidemiologic investigation
Source: Springer Nature journal article supplement (doi:10.1186/s12889-018-6171-5), 2018-11-14
Supplement: MOESM1 [file 16271742]

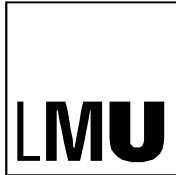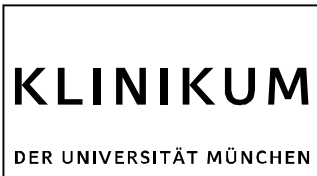

ARBEITSGRUPPE ARBEITS- UND  
UMWELTEPIDEMIOLOGIE & NET TEACHING  
LEITUNG: PROF. DR. KATJA RADON, MSc

INSTITUT UND POLIKLINIK FÜR  
ARBEITS-, SOZIAL- U. UMWELTMEDIZIN  
DIREKTOR: PROF. DR. MED. DENNIS NOWAK

CAMPUS INNENSTADT

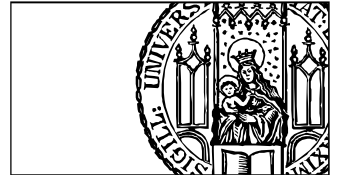

Studien-ID: «ID2»

# Fragebogen

# SASKIA

## Schichtarbeit, Schlafstörungen und kognitive Beeinträchtigungen im Alter

### Studienleitung:

Dr. Tobias Weinmann, MSc

Institut und Poliklinik für Arbeits-, Sozial- und Umweltmedizin

Klinikum der Universität München (LMU)

Ziemssenstr. 1, 80336 München

Telefon: 089/4400-52372

Telefax: 089/4400-54954

E-Mail: tobias.weinmann@med.uni-muenchen.de

# ALLGEMEINES

Wir möchten Sie zunächst um allgemeine Angaben zu Ihrer Person bitten.

## 1 Wann wurden Sie geboren?

|\_|\_|\_|.|\_|\_||.19|\_|\_||  
Tag Monat Jahr

## 2 Sind Sie männlich oder weiblich?

männlich.....   
weiblich .....

## 3 In welchem Land wurden Sie geboren?

---

## 4 Was ist Ihr Familienstand?

ledig .....   
verheiratet/in Partnerschaft lebend .....   
geschieden.....   
verwitwet .....

## 5 Was ist Ihr höchster Schul- bzw. Hochschulabschluss?

Hauptschulabschluss .....   
Realschulabschluss (Mittlere Reife) .....   
Fachhochschulreife (FOS, BOS, etc.) .....   
Abitur/Fachabitur .....   
Hochschule/Fachhochschule/Universität .....   
Kein Abschluss .....   
Anderer, .....   
welcher?

---

**6 Was ist der höchste Schul- bzw. Hochschulabschluss Ihres aktuellen bzw. letzten Partners?**

- Hauptschulabschluss .....
  - Realschulabschluss (Mittlere Reife) .....
  - Fachhochschulreife (FOS, BOS, etc.) .....
  - Abitur/Fachabitur .....
  - Hochschule/Fachhochschule/Universität .....
  - Kein Abschluss .....
  - Anderer, .....   
welcher?
- 

**7 Welches ist Ihr höchster berufsbildender Abschluss?**

- Fachschule/Berufsfachschule/Berufskolleg .....
  - Berufsschule/Lehre .....
  - Studium.....
  - Kein Abschluss.....
  - Anderer, .....   
welcher?
- 

**8 Was ist Ihre aktuelle Tätigkeit?**

- Vollzeit angestellt.....
  - Teilzeit angestellt.....
  - Rentner/in .....
  - Anderer, .....   
welche?
- 

**9 Haben Sie schon einmal ein Jahr lang geraucht?**

„Ja“ bedeutet mindestens 20 Päckchen Zigaretten oder 360g Tabak in Ihrem Leben oder ein Jahr lang eine Zigarette pro Tag oder eine Zigarre pro Woche

- Nein.....  Bitte weiter mit **Frage 11**
- Ja .....

**10 Haben Sie innerhalb des letzten Monats geraucht?**

Nein.....

Ja .....

**11 Wie viel Bier, Wein und Schnaps haben Sie am letzten Wochenende, also am Samstag und Sonntag, getrunken?**

Bier (auf **0,5 l** genau)                      |\_\_|\_\_|, |\_\_| Liter

Wein (auf **0,2 l** genau)                      |\_\_|\_\_|, |\_\_| Liter

Schnaps (**Anzahl der Gläser** à 0,02 l)    |\_\_|\_\_| Gläser

**12 Wie viel Bier, Wein und Schnaps haben Sie am letzten Werktag getrunken?**

Bier (auf **0,5 l** genau)                      |\_\_|\_\_|, |\_\_| Liter

Wein (auf **0,2 l** genau)                      |\_\_|\_\_|, |\_\_| Liter

Schnaps (**Anzahl der Gläser** à 0,02 l)    |\_\_|\_\_| Gläser

**13 Wie häufig treiben Sie gewöhnlich Sport, so dass Sie außer Atem geraten oder schwitzen? Bitte nur eine Antwort!**

Nie.....

Weniger als einmal pro Monat.....

Einmal pro Monat.....

Einmal pro Woche.....

2 – 3 mal pro Woche .....

4 – 6 mal pro Woche .....

Jeden Tag .....

**14 Was ist Ihr aktuelles Gewicht?**

|\_\_|\_\_|, |\_\_| kg

**15 Was ist Ihre Körpergröße?**

|\_\_|, |\_\_|\_\_| m

# GESUNDHEIT

Nun möchten wir Sie zu Ihrer Gesundheit befragen. Wenn Sie sich bei einer der Fragen nicht ganz sicher sind, kreuzen Sie bitte „Nein“ an.

## 16 Haben Sie jemals an einer der folgenden Krankheiten oder Beschwerden gelitten?

### 16.1 Neurologische Probleme wie Migräne oder Epilepsie

Nein.....

Ja .....

Falls ja, welche?

---

### 16.2 Krebserkrankung

Nein.....

Ja .....

Falls ja, welche?

---

### 16.3 Psychiatrische Erkrankung wie Depression oder Angststörung

Nein.....

Ja .....

Falls ja, welche?

---

### 16.4 Neurodegenerative Erkrankung wie Alzheimer, Parkinson oder ALS

Nein.....

Ja .....

Falls ja, welche?

---

**16.5 Probleme in den hormonellen und endokrinen Systemen wie Schilddrüsenerkrankung (Über-/Unterfunktion), Diabetes, etc.**

Nein.....

Ja .....

Falls ja, welche?

---

**16.6 Genetische Syndrome (Neurofibromatose, Turcot-Syndrom, etc.) oder angeborene Fehlbildungen**

Nein.....

Ja .....

Falls ja, welche?

---

**16.7 Allergien oder Asthma**

Nein.....

Ja .....

Falls ja, welche?

---

**16.8 Schlafstörungen (Einschlafstörungen, Durchschlafstörungen, vorzeitiges Erwachen, Schlafapnoe, etc.)**

Nein.....

Ja .....

Falls ja, welche?

---

**16.9 Andere schwerwiegende Krankheiten oder Beschwerden**

Nein.....

Ja .....

Falls ja, welche?

---

# SCHLAFVERHALTEN

Wir würden Sie nun gerne nach Ihrem **aktuellen Schlafverhalten an freien Tagen** sowie Ihrem Schlafverhalten an freien Tagen **als Sie 40 und 30 Jahre alt waren** fragen. Bitte füllen Sie die folgende Tabelle für jeden dieser drei Zeitpunkte aus.

| <i>17.1 bis 17.9</i>                                                                                                                          | <b>Aktuell</b>                                                                                                                                                                                                   | <b>Mit 40 Jahren</b>                                                                                                                                                                                             | <b>Mit 30 Jahren</b>                                                                                                                                                                                             |
|-----------------------------------------------------------------------------------------------------------------------------------------------|------------------------------------------------------------------------------------------------------------------------------------------------------------------------------------------------------------------|------------------------------------------------------------------------------------------------------------------------------------------------------------------------------------------------------------------|------------------------------------------------------------------------------------------------------------------------------------------------------------------------------------------------------------------|
| Ich gehe ins Bett um<br> _ _ : _ _  Uhr.                                                                                                      | _ _ : _ _ <br>Uhrzeit                                                                                                                                                                                            | _ _ : _ _ <br>Uhrzeit                                                                                                                                                                                            | _ _ : _ _ <br>Uhrzeit                                                                                                                                                                                            |
| Manche Menschen<br>bleiben noch eine<br>Weile wach, wenn sie<br>im Bett liegen!<br><br>Ich bin bereit<br>einzuschlafen um<br> _ _ : _ _  Uhr. | _ _ : _ _ <br>Uhrzeit                                                                                                                                                                                            | _ _ : _ _ <br>Uhrzeit                                                                                                                                                                                            | _ _ : _ _ <br>Uhrzeit                                                                                                                                                                                            |
| Um einzuschlafen<br>brauche ich<br>_____Minuten.                                                                                              | _____<br>Minuten                                                                                                                                                                                                 | _____<br>Minuten                                                                                                                                                                                                 | _____<br>Minuten                                                                                                                                                                                                 |
| Ich wache auf um<br> _ _ : _ _  Uhr.                                                                                                          | _ _ : _ _ <br>Uhrzeit                                                                                                                                                                                            | _ _ : _ _ <br>Uhrzeit                                                                                                                                                                                            | _ _ : _ _ <br>Uhrzeit                                                                                                                                                                                            |
| Ich wache mit<br>Wecker/ohne Wecker<br>auf.                                                                                                   | <input type="checkbox"/> Mit Wecker<br><input type="checkbox"/> Ohne Wecker                                                                                                                                      | <input type="checkbox"/> Mit Wecker<br><input type="checkbox"/> Ohne Wecker                                                                                                                                      | <input type="checkbox"/> Mit Wecker<br><input type="checkbox"/> Ohne Wecker                                                                                                                                      |
| Ich stehe auf nach<br>_____Minuten.                                                                                                           | _____<br>Minuten                                                                                                                                                                                                 | _____<br>Minuten                                                                                                                                                                                                 | _____<br>Minuten                                                                                                                                                                                                 |
| Ich mache tagsüber<br>öfter ein Nickerchen                                                                                                    | <input type="checkbox"/> Ja<br><input type="checkbox"/> Nein                                                                                                                                                     | <input type="checkbox"/> Ja<br><input type="checkbox"/> Nein                                                                                                                                                     | <input type="checkbox"/> Ja<br><input type="checkbox"/> Nein                                                                                                                                                     |
| Wenn ja: Ich mache<br>das Nickerchen<br>zwischen<br> _ _ : _ _  und<br> _ _ : _ _  Uhr.                                                       | Von<br> _ _ : _ _ <br>bis<br> _ _ : _ _ <br>Uhr.                                                                                                                                                                 | Von<br> _ _ : _ _ <br>bis<br> _ _ : _ _ <br>Uhr.                                                                                                                                                                 | Von<br> _ _ : _ _ <br>bis<br> _ _ : _ _ <br>Uhr.                                                                                                                                                                 |
| Oft hört man von<br>„Morgen-Typen“ und<br>„Abend-Typen“. Wie<br>schätzen Sie sich<br>selbst ein?                                              | <input type="checkbox"/> Definitiv ein<br>Morgen-Typ<br><input type="checkbox"/> Eher ein<br>Morgen-Typ<br><input type="checkbox"/> Eher ein<br>Abend-Typ<br><input type="checkbox"/> Definitiv ein<br>Abend-Typ | <input type="checkbox"/> Definitiv ein<br>Morgen-Typ<br><input type="checkbox"/> Eher ein<br>Morgen-Typ<br><input type="checkbox"/> Eher ein<br>Abend-Typ<br><input type="checkbox"/> Definitiv ein<br>Abend-Typ | <input type="checkbox"/> Definitiv ein<br>Morgen-Typ<br><input type="checkbox"/> Eher ein<br>Morgen-Typ<br><input type="checkbox"/> Eher ein<br>Abend-Typ<br><input type="checkbox"/> Definitiv ein<br>Abend-Typ |

# BERUFSGESCHICHTE

Wir möchten Sie des Weiteren nach **allen hauptberuflichen Tätigkeiten** fragen, die Sie bisher hatten. Mit Hauptberuf meinen wir die Tätigkeit, mit der Sie die meiste Zeit verbracht haben. Bitte berücksichtigen Sie alle Tätigkeiten, die Sie **mindestens 12 Monate** lang ausgeübt haben. Beginnen Sie bitte mit Ihrer aktuellen bzw. zuletzt ausgeführten beruflichen Tätigkeit.

## 18 Erste (=aktuelle/letzte) Tätigkeit

18.1 Startdatum: |\_|\_|\_|\_|/|\_|\_|\_|  
Jahr Monat

Enddatum: |\_|\_|\_|\_|/|\_|\_|\_|  
Jahr Monat

*(falls Sie immer noch in diesem Job arbeiten, geben Sie bitte das aktuelle Datum an)*

18.2 Wie lautet der Name der Einrichtung/des Unternehmens?

---

18.3 Was ist/war Ihre Tätigkeit?

---

18.4 Haben Sie Vollzeit, Teilzeit oder gelegentlich in diesem Job gearbeitet?

|1| Vollzeit

|2| Teilzeit

|3| Gelegentlich

18.5 Hat diese Tätigkeit **Nachtschichten**, d.h. Schichten, die den Zeitraum zwischen 0 und 5 Uhr einschließen, beinhaltet?

Nein..... Bitte weiter mit Frage 18.7

Ja .....

18.6 Wenn ja, wie viele **Nachtschichten** sind/waren es durchschnittlich im Monat?

Anzahl der Nachtschichten:\_\_\_\_\_

18.7 Hat diese Tätigkeit **Frühschichten**, d.h. Schichten mit Dienstbeginn vor 7 Uhr, beinhaltet?

Nein..... Bitte weiter mit Frage 19

Ja .....

18.8 Wenn ja, wie viele **Frühschichten** sind/waren es durchschnittlich im Monat?

Anzahl der Frühschichten:\_\_\_\_\_



## 19 Zweite Tätigkeit

19.1 Startdatum: |\_|\_|\_|\_|\_|/|\_|\_|\_|  
Jahr Monat

Enddatum: |\_|\_|\_|\_|\_|/|\_|\_|\_|  
Jahr Monat

*(falls Sie immer noch in diesem Job arbeiten, geben Sie bitte das aktuelle Datum an)*

19.2 Wie lautet der Name der Einrichtung/des Unternehmens?

---

19.3 Was ist/war Ihre Tätigkeit?

---

19.4 Haben Sie Vollzeit, Teilzeit oder gelegentlich in diesem Job gearbeitet?

|1| Vollzeit

|2| Teilzeit

|3| Gelegentlich

19.5 Hat diese Tätigkeit Nachtschichten, d.h. Schichten, die den Zeitraum zwischen 0 und 5 Uhr einschließen, beinhaltet?

Nein..... Bitte weiter mit Frage 19.7

Ja .....

19.6 Wenn ja, wie viele Nachtschichten sind/waren es durchschnittlich im Monat?

Anzahl der Nachtschichten: \_\_\_\_\_

19.7 Hat diese Tätigkeit Frühschichten, d.h. Schichten mit Dienstbeginn vor 7 Uhr, beinhaltet?

Nein..... Bitte weiter mit Frage 20

Ja .....

19.8 Wenn ja, wie viele Frühschichten sind/waren es durchschnittlich im Monat?

Anzahl der Frühschichten: \_\_\_\_\_

## 20 Dritte Tätigkeit

20.1 Startdatum: |\_|\_|\_|\_|/|\_|\_|\_|  
Jahr Monat

Enddatum: |\_|\_|\_|\_|/|\_|\_|\_|  
Jahr Monat

*(falls Sie immer noch in diesem Job arbeiten, geben Sie bitte das aktuelle Datum an)*

20.2 Wie lautet der Name der Einrichtung/des Unternehmens?

---

20.3 Was ist/war Ihre Tätigkeit?

---

20.4 Haben Sie Vollzeit, Teilzeit oder gelegentlich in diesem Job gearbeitet?

|1| Vollzeit

|2| Teilzeit

|3| Gelegentlich

20.5 Hat diese Tätigkeit Nachtschichten, d.h. Schichten, die den Zeitraum zwischen 0 und 5 Uhr einschließen, beinhaltet?

Nein..... Bitte weiter mit Frage 20.7

Ja .....

20.6 Wenn ja, wie viele Nachtschichten sind/waren es durchschnittlich im Monat?

Anzahl der Nachtschichten:\_\_\_\_\_

20.7 Hat diese Tätigkeit Frühschichten, d.h. Schichten mit Dienstbeginn vor 7 Uhr, beinhaltet?

Nein..... Bitte weiter mit Frage 21

Ja .....

20.8 Wenn ja, wie viele Frühschichten sind/waren es durchschnittlich im Monat?

Anzahl der Frühschichten:\_\_\_\_\_

## 21 Vierte Tätigkeit

21.1 Startdatum: |\_|\_|\_|\_|/|\_|\_|\_|  
Jahr Monat

Enddatum: |\_|\_|\_|\_|/|\_|\_|\_|  
Jahr Monat

*(falls Sie immer noch in diesem Job arbeiten, geben Sie bitte das aktuelle Datum an)*

21.2 Wie lautet der Name der Einrichtung/des Unternehmens?

---

21.3 Was ist/war Ihre Tätigkeit?

---

21.4 Haben Sie Vollzeit, Teilzeit oder gelegentlich in diesem Job gearbeitet?

|1| Vollzeit

|2| Teilzeit

|3| Gelegentlich

21.5 Hat diese Tätigkeit Nachtschichten, d.h. Schichten, die den Zeitraum zwischen 0 und 5 Uhr einschließen, beinhaltet?

Nein..... Bitte weiter mit Frage 21.7

Ja .....

21.6 Wenn ja, wie viele Nachtschichten sind/waren es durchschnittlich im Monat?

Anzahl der Nachtschichten:\_\_\_\_\_

21.7 Hat diese Tätigkeit Frühschichten, d.h. Schichten, die den Zeitraum zwischen 0 und 5 Uhr einschließen, beinhaltet?

Nein..... Bitte weiter mit Frage 22

Ja .....

21.8 Wenn ja, wie viele Frühschichten sind/waren es durchschnittlich im Monat?

Anzahl der Frühschichten:\_\_\_\_\_

## 22 Fünfte Tätigkeit

22.1 Startdatum: |\_|\_|\_|\_|/|\_|\_|\_|\_|  
Jahr Monat

Enddatum: |\_|\_|\_|\_|/|\_|\_|\_|\_|  
Jahr Monat

*(falls Sie immer noch in diesem Job arbeiten, geben Sie bitte das aktuelle Datum an)*

22.2 Wie lautet der Name der Einrichtung/des Unternehmens?

---

22.3 Was ist/war Ihre Tätigkeit?

---

22.4 Haben Sie Vollzeit, Teilzeit oder gelegentlich in diesem Job gearbeitet?

|1| Vollzeit

|2| Teilzeit

|3| Gelegentlich

22.5 Hat diese Tätigkeit Nachtschichten, d.h. Schichten, die den Zeitraum zwischen 0 und 5 Uhr einschließen, beinhaltet?

Nein..... Bitte weiter mit Frage 22.7

Ja .....

22.6 Wenn ja, wie viele Nachtschichten sind/waren es durchschnittlich im Monat?

Anzahl der Nachtschichten:\_\_\_\_\_

22.7 Hat diese Tätigkeit Frühschichten, d.h. Schichten mit Dienstbeginn vor 7 Uhr, beinhaltet?

Nein..... Bitte weiter mit Frage 23

Ja .....

22.8 Wenn ja, wie viele Frühschichten sind/waren es durchschnittlich im Monat?

Anzahl der Frühschichten:\_\_\_\_\_

Falls Sie weitere Tätigkeiten hatten, geben Sie diese bitte auf der Rückseite der letzten Seite des Fragebogens an.

# SCHICHTARBEIT

Abschließend möchten wir Sie um einige weitere Angaben zu Ihrer Arbeit in **Schichtsystemen** fragen. Berücksichtigen Sie hierbei bitte **alle beruflichen Tätigkeiten**, die Sie jemals ausgeübt haben. Wenn Sie sich bei einer der Fragen nicht ganz sicher sind, kreuzen Sie bitte „Nein“ an.

## 23 Haben Sie jemals in Schichtarbeit gearbeitet?

Schichtarbeit heißt, dass Beginn oder Ende der Tätigkeit **regelmäßig** außerhalb der als üblich betrachteten Tagesarbeitszeit (von 7 bis 18 Uhr) liegen

Nein .....

Ja .....

## 24 Falls ja, wie viele Jahre haben Sie insgesamt in Ihrem Leben in Schichtarbeit gearbeitet?

(wenn weniger als 1 Jahr bitte 0 eintragen)

Anzahl der Jahre: \_\_\_\_\_

## 25 Wie viele Jahre haben Sie insgesamt mit Nachtschichten, d.h. mit Schichten die den Zeitraum zwischen 0 und 5 Uhr einschließen, gearbeitet?

(wenn weniger als 1 Jahr bitte 0 eintragen)

Anzahl der Jahre: \_\_\_\_\_

## 26 Wie viele Jahre haben Sie insgesamt ausschließlich in Nachtschichten gearbeitet? (d.h. keine Schichten außer Nachtschicht)

(wenn weniger als 1 Jahr bitte 0 eintragen)

Anzahl der Jahre: \_\_\_\_\_

## 27 Wann haben Sie zuletzt in Nachtschicht gearbeitet?

|\_|\_|\_|\_|

Jahr

## 28 Wie viele Jahre haben Sie insgesamt mit Frühschichten, d.h. mit Dienstbeginn vor 7 Uhr, gearbeitet?

(wenn weniger als 1 Jahr bitte 0 eintragen)

Anzahl der Jahre: \_\_\_\_\_

## 29 Wie viele Jahre haben Sie insgesamt ausschließlich in Frühschichten gearbeitet? (d.h. keine Schichten außer Frühschicht)

(wenn weniger als 1 Jahr bitte 0 eintragen)

Anzahl der Jahre: \_\_\_\_\_

## 30 Wann haben Sie zuletzt in Frühschicht gearbeitet?

|\_|\_|\_|\_|

Jahr

**Herzlichen Dank für Ihre Teilnahme!**

**Haben Sie noch Anmerkungen zu diesem Fragebogen?**

**Für Anregungen sind wir dankbar!**

---

---
